# Supplementary material for: Towards high-performance nonlinear optical materials through embedding a D–A system into β-ketoenamine-linked COFs
Source: Royal Society of Chemistry journal article supplement (doi:10.1039/d3cc04845d), 2023-01-01
Supplement: d3cc04845d1.pdf [file d3cc04845d1.pdf]

## Supporting Information

### **Towards high-performance nonlinear optical through embedding D-A system into $\beta$ -ketoenamine-linked COFs**

*Mingyan Li<sup>a</sup>, Jiahui Chu<sup>a</sup>, Debo Ding<sup>a</sup>, Tingting Li<sup>a</sup>, Endian Su<sup>a</sup>, Yinglin Song<sup>b</sup>, Yun-Fang Yang<sup>a</sup>, Yuanbin She<sup>a,\*</sup>, and Jianhong Jia<sup>a,\*</sup>*

<sup>a</sup> College of Chemical Engineering, Zhejiang University of Technology, Hangzhou 310014, China, E-mail: [zgdjjh@163.com](mailto:zgdjjh@163.com) (J. Jia); [sheyb@zjut.edu.cn](mailto:sheyb@zjut.edu.cn) (Y. She)

<sup>b</sup> School of Physical Science and Technology, Soochow University, Suzhou 215123, China

## Experimental Section

### 1. Material

1,3,5-Triformylbenzene (TF) and 2,4,6-trihydroxybenzene-1,3,5-trialdehyde (TFP) were purchased from BIDE PHARMATECH CO., LTD. Tetrahydrofuran (THF), *o*-dichlorobenzene (*o*-DCB), *n*-butyl alcohol (*n*-BuOH), acetic acid, N,N-dimethylacetamide (DMAC), and acetone were purchased from chemical reagent manufacturers. Glass blocks (NeVid S27105) with dimensions of 25.0 × 75.0 mm and thickness of 1.0 ~ 1.2 mm were used. Before use, they were cut into rectangles of size 1.0 × 0.8 cm using a glass knife. The N<sub>4</sub>,N<sub>4</sub>-bis(4'-amino-[1,1'-biphenyl]-4-yl)-[1,1'-biphenyl-4,4'-diamin] (BABD) used in this study was from the same batch as those reported by Li *et al.* and further characterization can be found therein.<sup>1</sup> With the exception of BABD, all chemicals utilized in this study were obtained commercially and employed without further purification.

### 2. Experimental Section

#### 2.1. Preparation of TF-BD Powder and Film

N<sub>4</sub>,N<sub>4</sub>-bis(4'-amino-[1,1'-biphenyl]-4-yl)-[1,1'-biphenyl-4,4'-diamin] (BABD, 40.0 mg, 0.0771 mmol) and 1,3,5-triformylbenzene (TF, 12.5 mg, 0.0771 mmol) was successively added into 5 mL glass bottles. Subsequently, 1.25 mL of *o*-dichlorobenzene (*o*-DCB) and 1.25 mL of *n*-butanol (*n*-BuOH) were added, and the resulting mixture was ultrasound treated for 5 minutes. Next, the pre-treated glass sheets were added to the mixture, and the entire mixture was transferred to a 25 mL glass ampere bottle along with the glass sheets. Additionally, 0.25 mL of 6 M acetic acid was added to the mixture. Following this, the mixture was sealed and subjected to three freezing-vacuum-thawing cycles at a temperature of 77 K liquid nitrogen. Subsequently, it was heated at a temperature of 120 °C for a duration of 5 days. Once the reaction had cooled to room temperature, the glass sheet was cleaned using N,N-dimethylacetamide (DMAC) and acetone to obtain the TF-BD film. The remaining solids were washed three times using DMAC and acetone filtration. The obtained powder was extracted by Soxhlet extraction with THF and acetone acted as detergents for 48 h. Finally, TF-BD was obtained as a yellow powder after undergoing vacuum activation at a temperature of 90 °C for 24 hours.

## 2.2. Preparation of TFP-BD Powder and Film

A 5 mL glass bottle was used to combine BABD (36.9 mg, 0.0711 mmol) and 2,4,6-triformylphloroglucinol (TFP, 15.0 mg, 0.0711 mmol) with 1.5 mL of *o*-DCB and 1.5 mL of *n*-BuOH. Ultrasound treatment was applied to the mixture for 5 minutes. Subsequently, the pre-treated glass sheets were added to the mixture, and the entire mixture was transferred to a 25 mL glass ampere bottle along with the glass sheets. Additionally, 0.30 mL of 6 M acetic acid was added to the mixture. Following this, the mixture was sealed and subjected to three freezing-vacuum-thawing cycles at a temperature of 77 K liquid nitrogen. Next, the reaction was heated at 120 °C for 3 days. After cooling to room temperature, the glass sheet was washed with DMAC and acetone to obtain the TFP-BD film. The residual solution from the reaction system was filtered, and the resulting solids were washed three times with DMAC and acetone. The obtained powder was Soxhlet extraction with THF and acetone acted as detergents for 48 hours. Finally, the yellow powder of TFP-BD was obtained after vacuum activation at 90 °C for 24 hours.

## 3. Characterization

Power X-ray diffraction (PXRD) patterns were collected using a Cu K $\alpha$  radiation X-ray diffraction system (DX-27mini, China). Fourier transform infrared (FT-IR) spectra were measured using an IR spectrometer (Nicolet 6700) in the ranges of 4000 to 400 cm<sup>-1</sup>. X-ray Photoelectron Spectroscopy (XPS) was performed on a Thermo Scientific K-Alpha XPS system equipped with a monochromatic Al K $\alpha$  X-ray source ( $h\nu = 1486.6$  eV). The binding energies in all obtained XPS spectra were calibrated using the C 1s peak at 284.8 eV. Solid-state NMR spectra were acquired using a Bruker 400M spectrometer with cross-polarization magic-angle-spinning (CP/MAS) at a resonance frequency of 150.9 MHz. <sup>13</sup>C CP/MAS NMR spectra were recorded using a 4 mm MAS probe and a spinning rate of 10 kHz. A contact time of 4 s and a recycle delay of 6.5  $\mu$ s were used for the <sup>13</sup>C CP/MAS NMR measurement. The chemical shifts of <sup>13</sup>C were externally referenced to tetramethylsilane (TMS). Scanning electron microscopy (SEM) images were obtained using a GeminiSEM 500 system. Transmission electron microscopy (TEM) images were acquired using a Tecnai G2 F30 S-Twin. Thermogravimetric analysis (TGA) was performed using a NETZSCH TG 209 F1 Libra under flowing N<sub>2</sub> with a ramp rate of 20 K min<sup>-1</sup>. The Brunauer-Emmett-Teller (BET) surface areas were calculated from N<sub>2</sub>

sorption isotherms at 77 K using a Micromeritics ASAP 2460 3.01 system surface area and pore size analyzer. Solid-state ultraviolet-visible (UV-Vis) absorption of the sample was recorded using the Shimadzu UV-2600i UV-visible absorption spectrum. The band gap width of the material is calculated using the Tauc plot method and extrapolating the straight-line part to the intersection of the abscissa. Atomic force microscopy study (AFM) images were obtained using a Bruker Dimension Icon atomic force microscope.

#### **4. Computational Methods**

The structure optimizations were performed using the Gaussian 16 package<sup>2</sup>, and the density functional theory (DFT) method B3LYP-D3 (with the default D3 dispersion correction proposed by Grimme)<sup>3-5</sup> with the 6-31G(d) basis-set.<sup>6-8</sup> To perform the quantum mechanics calculation for COF material, the model was constructed by extracting a unit from the COF material, and the boundaries of the truncated unit were capped with hydrogen atoms. Hybrid DFT methods, such as B3LYP, predict many of the electronic properties correctly, and it performs well for different properties of conjugated polymers, such as geometries and band gaps<sup>9-12</sup> The HOMO/LUMO and their energies were computed at the B3LYP-D3/6-31G(d) level. Structural modeling of COFs was generated using the BIOVIA Materials Studio<sup>13</sup> program employing the Building (Crystal) module, and the lattice model was geometrically optimized using force-field based method (Forcite molecular dynamics module) and SCC-DFTB (DFTB + module). Pawley fitting (Reflex module) was performed iteratively to optimize the lattice parameters until the  $R_{wp}$  value converged and showed good agreement with the overlay of observed and refined profiles. Powder indexing and Rietveld refinement were performed using EXPO2014<sup>14</sup> various topology structures were illustrated using VESTA software<sup>15</sup>.

#### **5. Nonlinear optical measurements**

The third-order nonlinear optical (NLO) properties of TF-BD and TFP-BD films were investigated using open-aperture Z-scan techniques. The laser used in the experiment was a mode-locked Nd:YAG laser at 532 nm. The ENERGY probe was Rj-7620 ENERGY RATIONOMETER, with detection wavelength of 532 nm, pulse width of 4 ns, the laser pulse energy of 5-10  $\mu$ J, and focal spot beam waist radius of 30  $\mu$ m. The glass sheet attached to the sample was placed on a mobile platform and used directly for testing. All testing procedures were conducted at room temperature. The sample moves in the direction of optical path propagation near the focal point of the lens, and the transmittance was monitored by two energy detectors.

Normalized transmittance higher than 1.0 will be observed when the sample exhibits saturable absorption (SA). In contrast, a normalized transmittance lower than 1.0 indicates that the sample has reverse saturated absorption (RSA)<sup>16</sup>.

In addition, the nonlinear absorption coefficients ( $\beta$ ) of TF-BD and TFP-BD films were fitted by the formula.

$$T = \frac{1}{\sqrt{\pi} \left[ \frac{\beta I_0 L_{\text{eff}}}{\left(1 + \frac{Z^2}{Z_0^2}\right)} \right]} \int_{-\infty}^{+\infty} \ln \left[ 1 + \frac{\beta I_0 L_{\text{eff}}}{\left(1 + \frac{Z^2}{Z_0^2}\right)} \exp(-t^2) \right] dt$$

Where T is normalized transmittance,  $I_0$  is the input peak intensity at the focal point, and  $Z_0$  is the Rayleigh diffraction length which can be calculated by  $Z_0 = \pi \omega_0^2 / \lambda$ .  $\lambda$  is the wavelength,  $L_{\text{eff}} = (1 - e^{-\alpha_0 L}) / \alpha_0$ . The thickness (L) in the fitting formula uses the COF films thickness measured by AFM. Since COF films are attached to both sides of the glass sheet during the preparation of COF films, the L used in the calculation of COFs  $\beta$  is twice the thickness of the film measured by the actual AFM.

## Figures and Tables

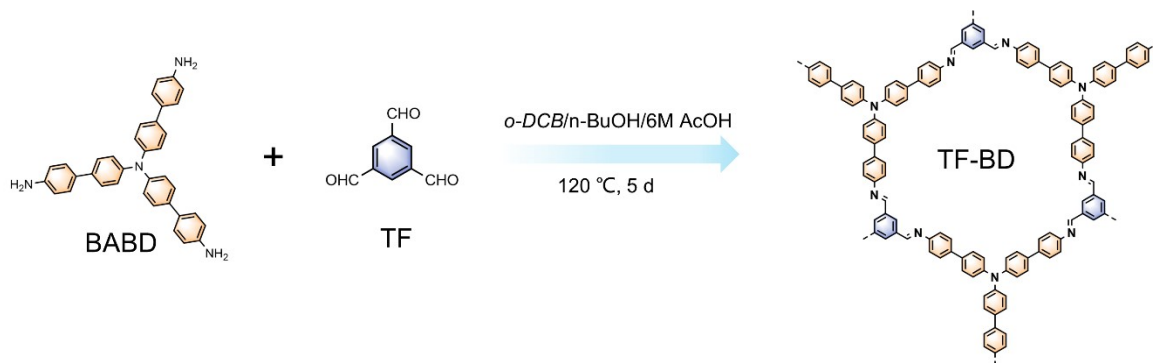

**Scheme S1.** Syntheses and structures of TF-BD.

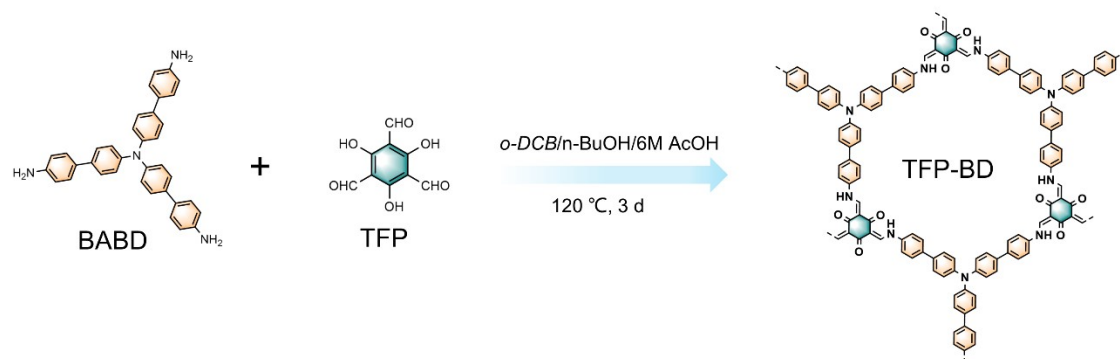

**Scheme S2.** Syntheses and structures of TFP-BD.

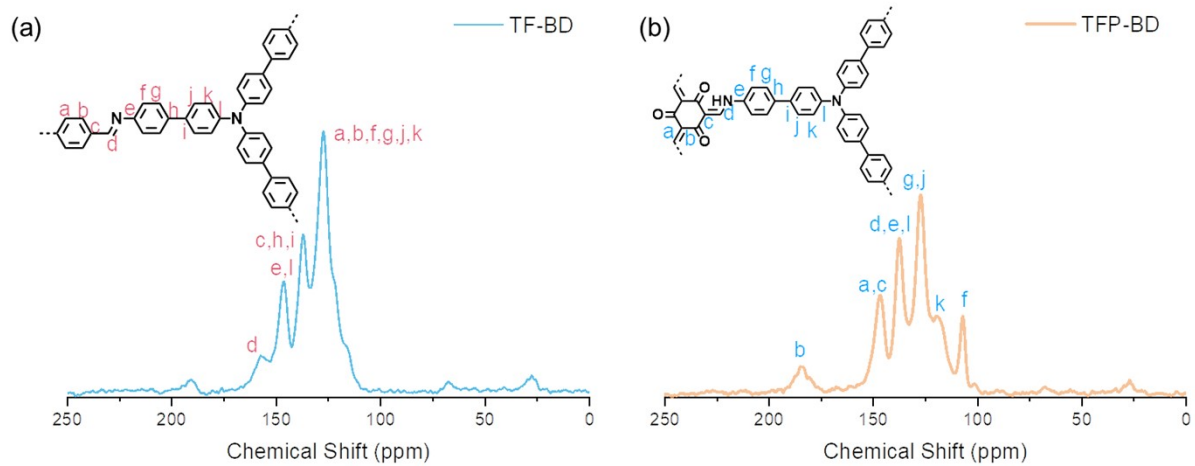

**Figure S1.** Solid-state CP-MAS  $^{13}\text{C}$  NMR of (a) TF-BD and (b) TFP-BD.

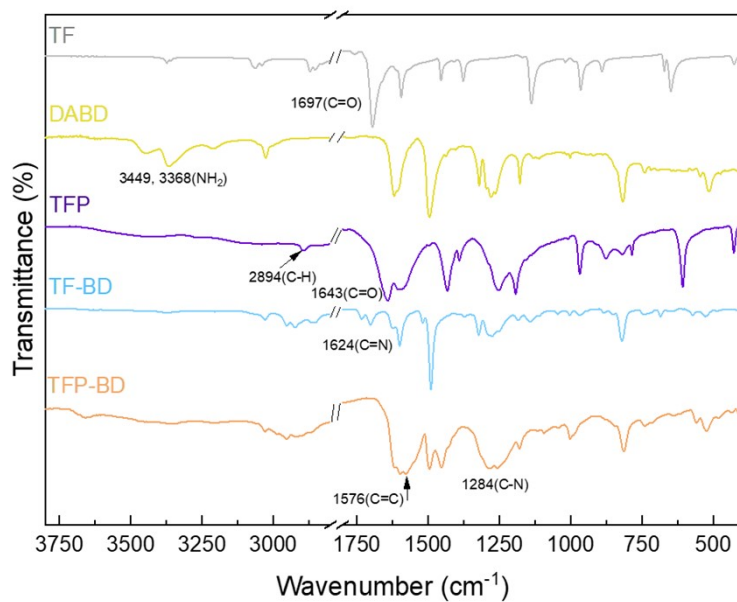

**Figure S2.** FT-IR spectra of TF, TFP, BABD, TF-BD, and TFP-BD.

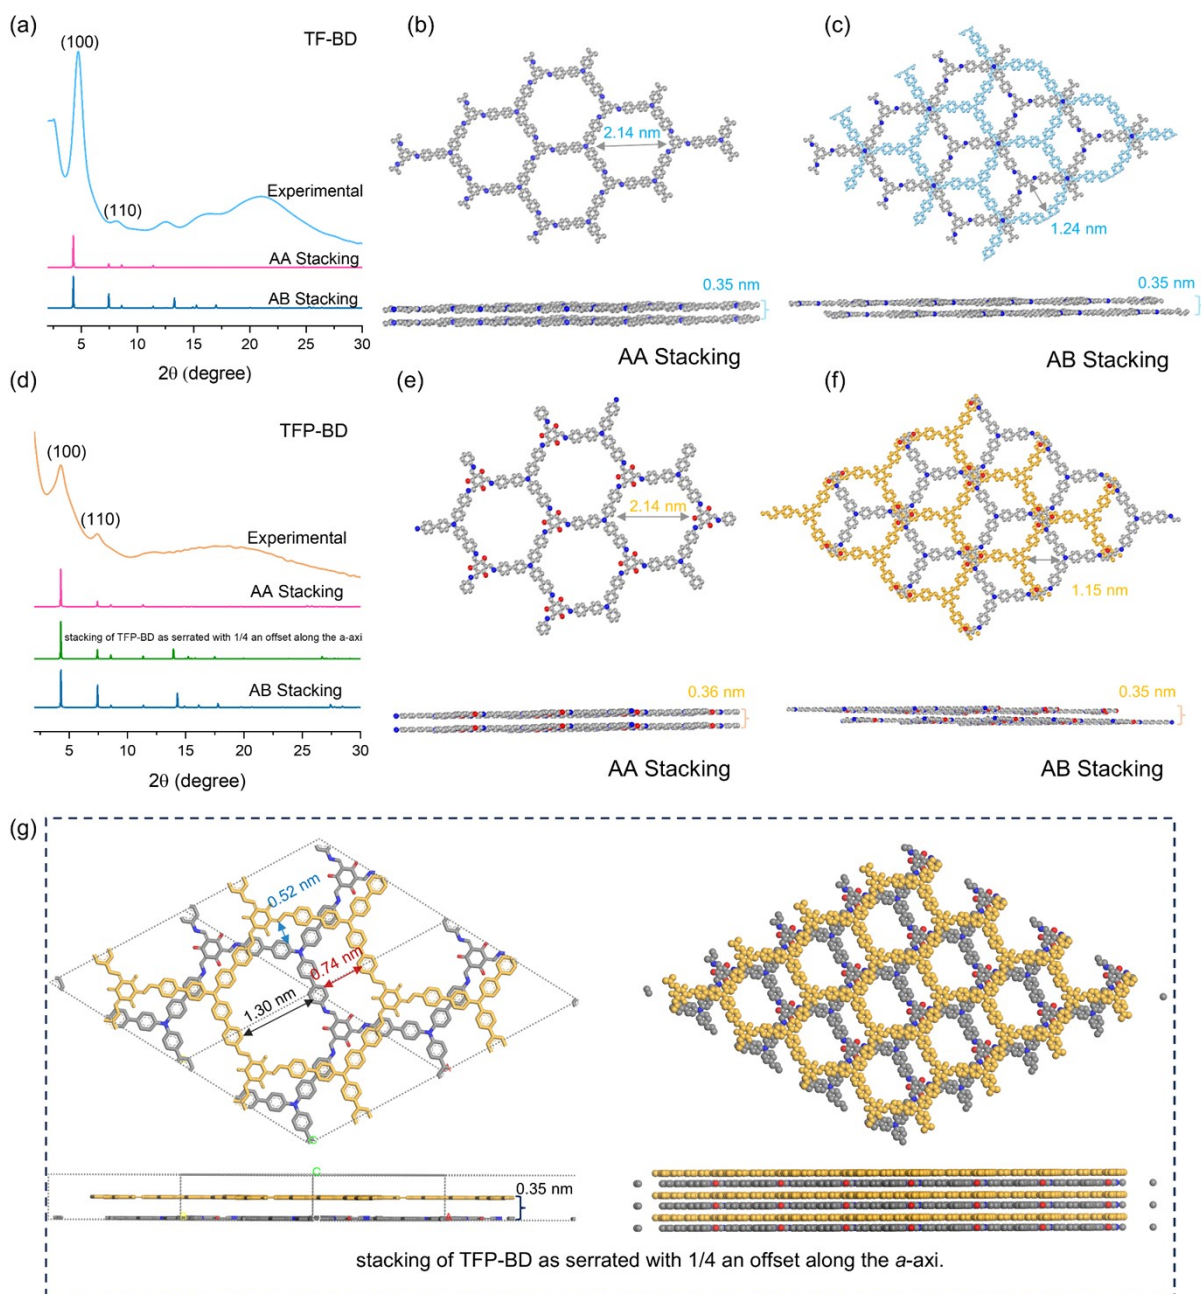

**Figure S3.** The top and side views of the structural model of COFs with eclipsed (AA) and staggered (AB) stacking (Gray: C; Blue: N; Red: O). (a) Experimental and simulated PXRD patterns for TF-BD. (b) AA stacking structure of TF-BD. (c) AB stacking structure of TF-BD. (d) Experimental and simulated PXRD patterns for TFP-BD. (e) AA stacking structure of TFP-BD. (f) AB stacking structure of TFP-BD. (g) stacking of TFP-BD as serrated with 1/4 an offset along the a-axis.



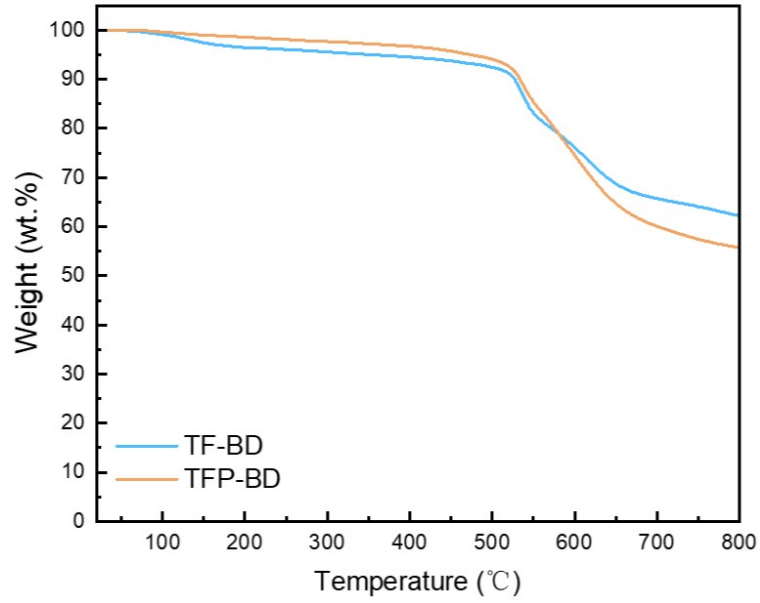

**Figure S4.** TGA curves of TF-BD and TFP-BD.

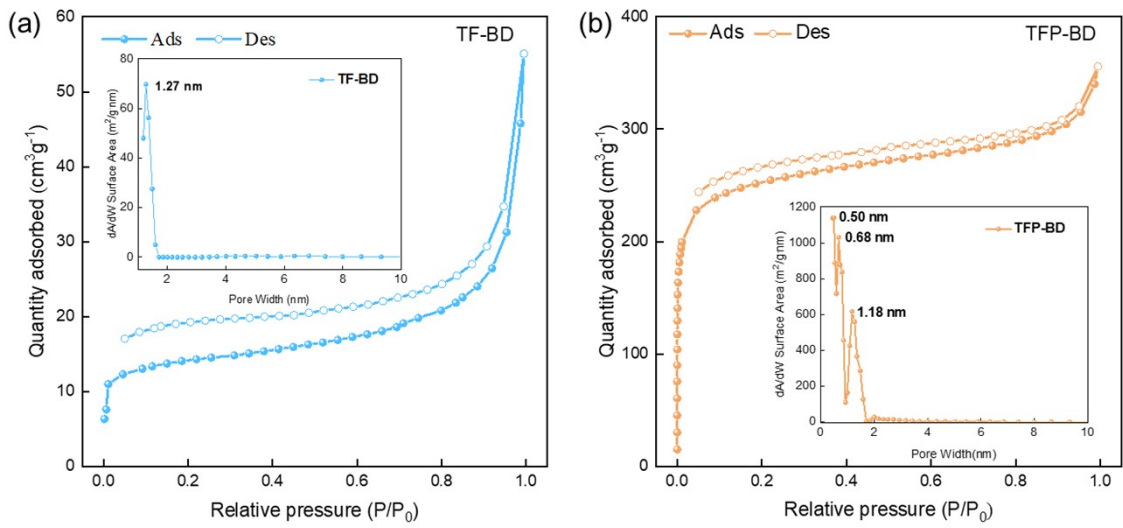

**Figure S5.** Nitrogen sorption isotherm of the (a) TF-BD and (b) TFP-BD measured at 77 K (Inset: Pore size distribution profile of the TF-BD and TFP-BD, respectively).

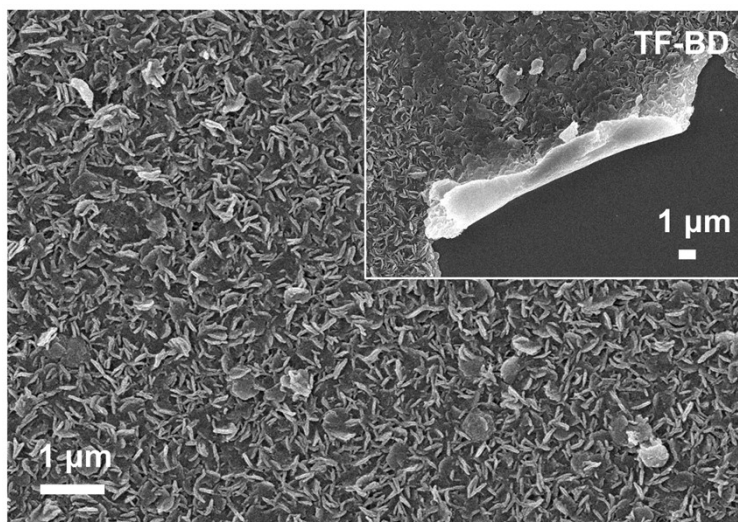

**Figure S6.** SEM images of TF-BD film.

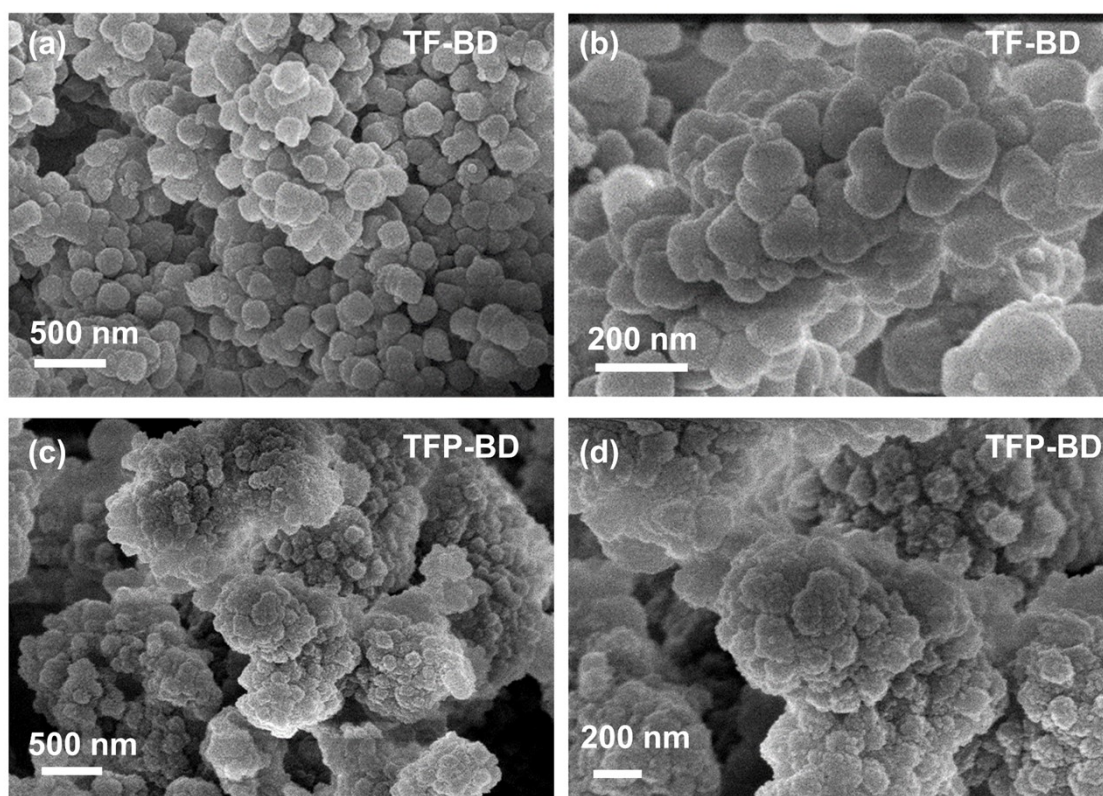

**Figure S7.** (a, b) SEM images of TF-BD powder, (c, d) SEM images of TFP-BD powder.

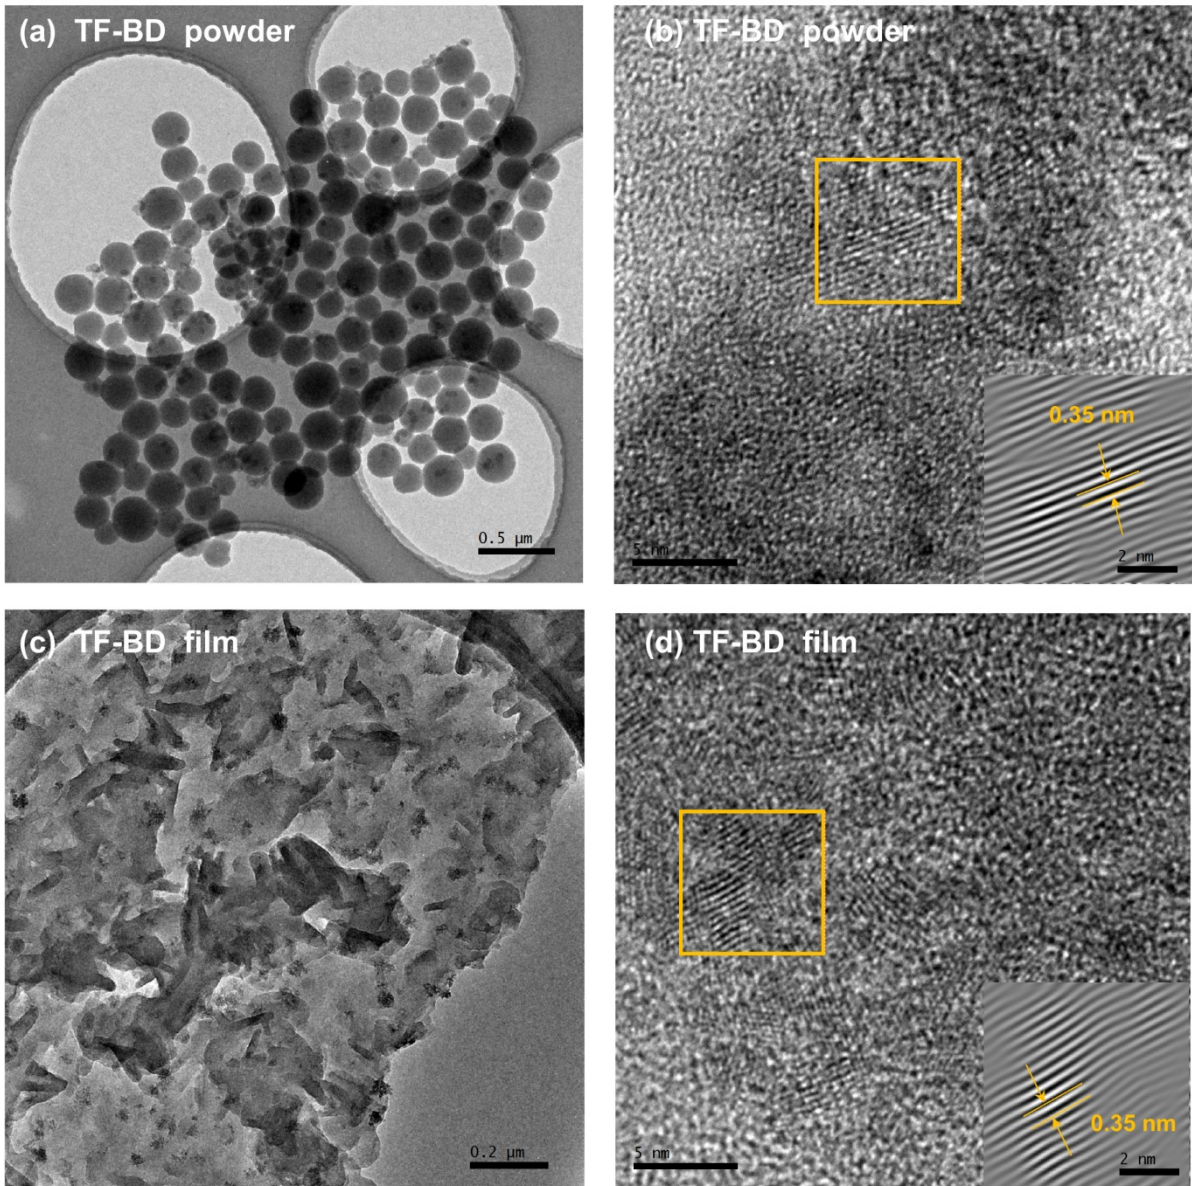

**Figure S8.** (a) TEM and (b) HR-TEM images of TF-BD powder. (c) TEM and (d) HR-TEM images of TF-BD film.

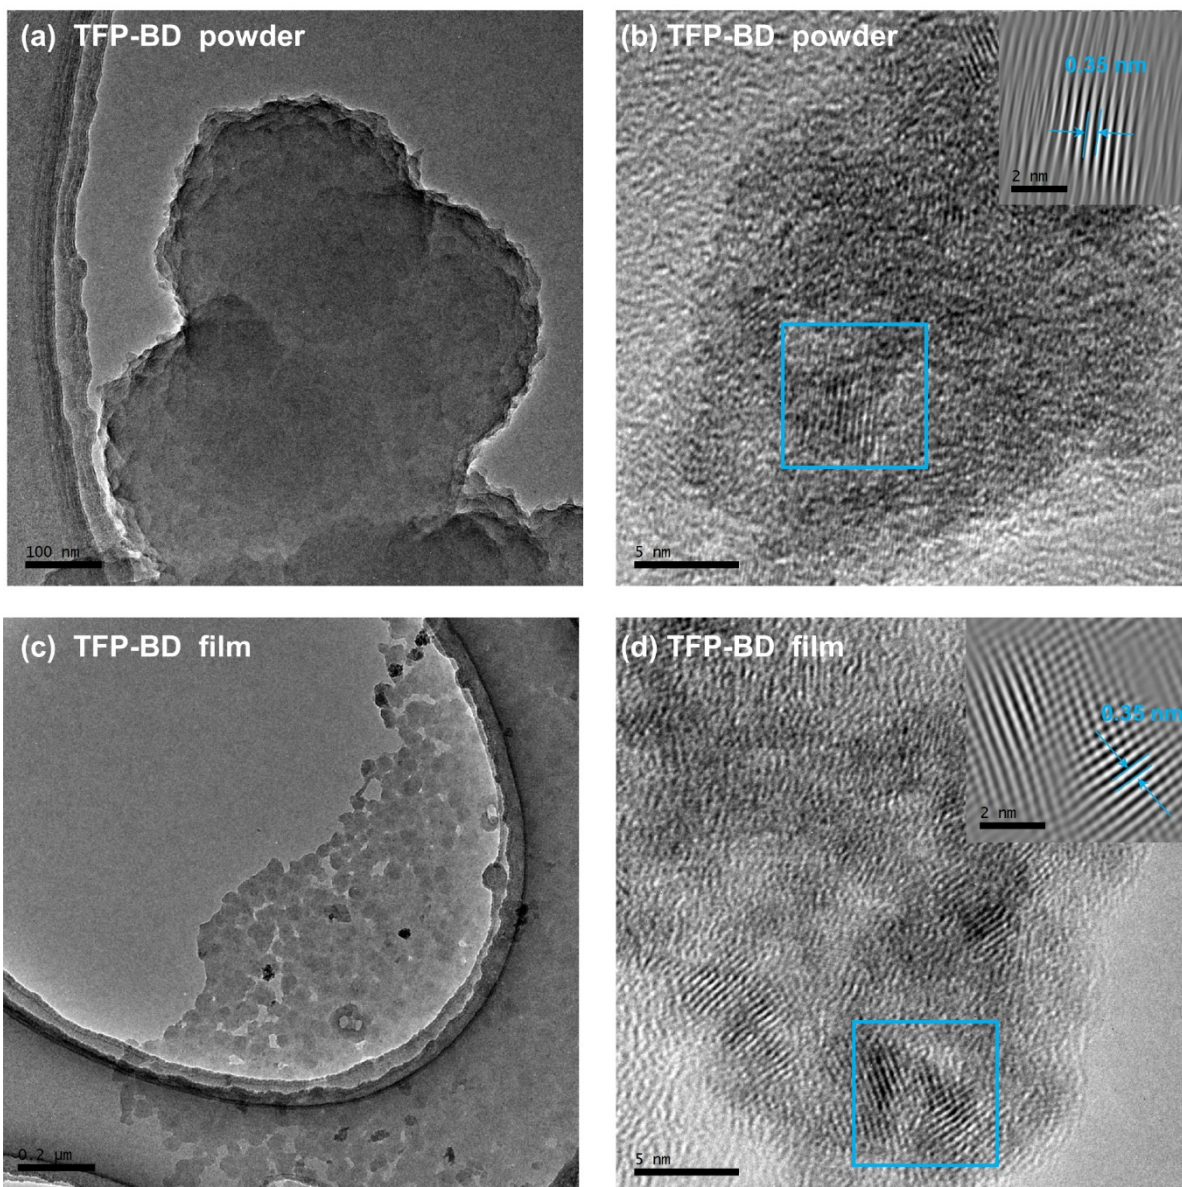

**Figure S9.** (a) TEM and (b) HR-TEM images of TFP-BD powder. (c) TEM and (d) HR-TEM images of TFP-BD film.

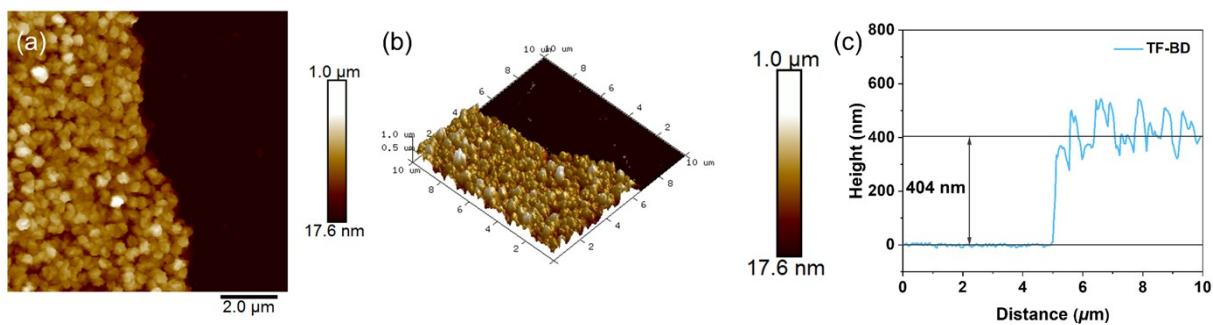

**Figure S10.** (a) AFM graph, (b) 3D graphs and (c) height profiles of TF-BD COF film.

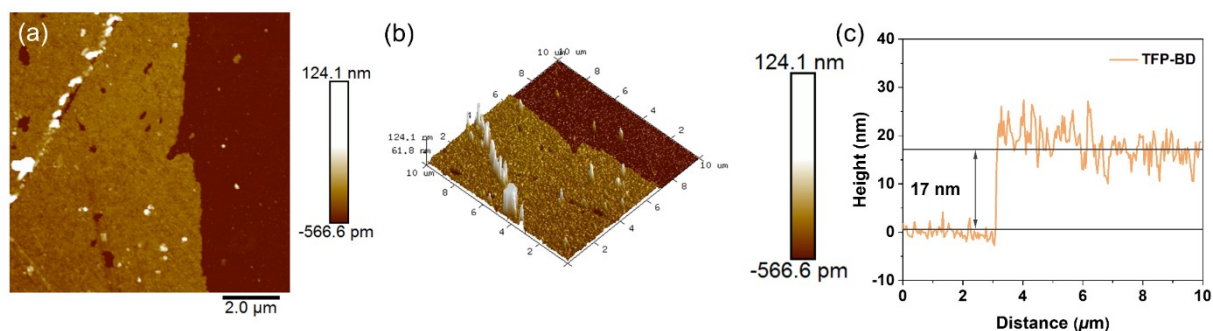

**Figure S11.** (a) AFM graph, (b) 3D graphs and (c) height profiles of TFP-BD COF film.

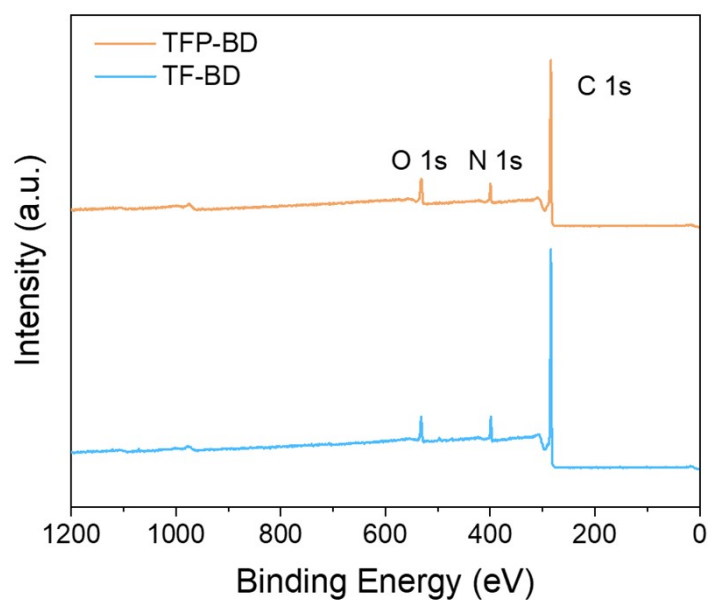

**Figure S12.** Survey XPS spectra of COF films.

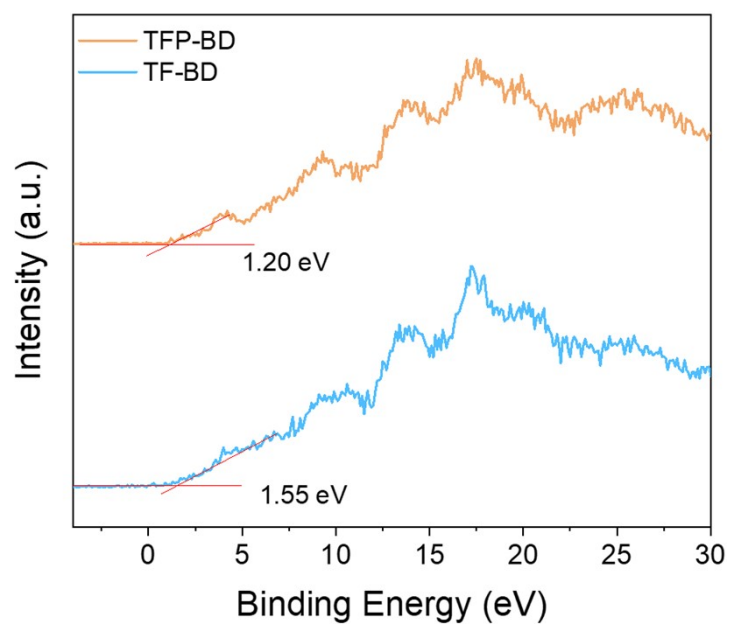

**Figure S13.** Valence-band XPS spectrum of TFP-BD and TF-BD COFs.

**Table S1.** Summary of the proportions of different elements in COFs by XPS analysis.

| Sample        | C (wt%) | N (wt%) | O (wt%) |
|---------------|---------|---------|---------|
| <b>TF-BD</b>  | 87.55   | 6.96    | 5.49    |
| <b>TFP-BD</b> | 85.69   | 6.03    | 8.28    |

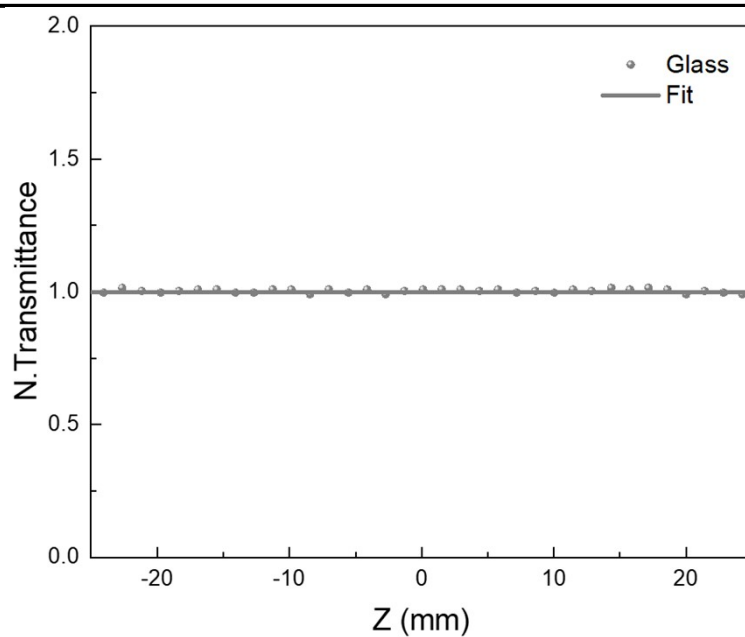

**Figure S14.** Open-aperture Z-scan curves of glass at pulse energy of 10  $\mu$ J.

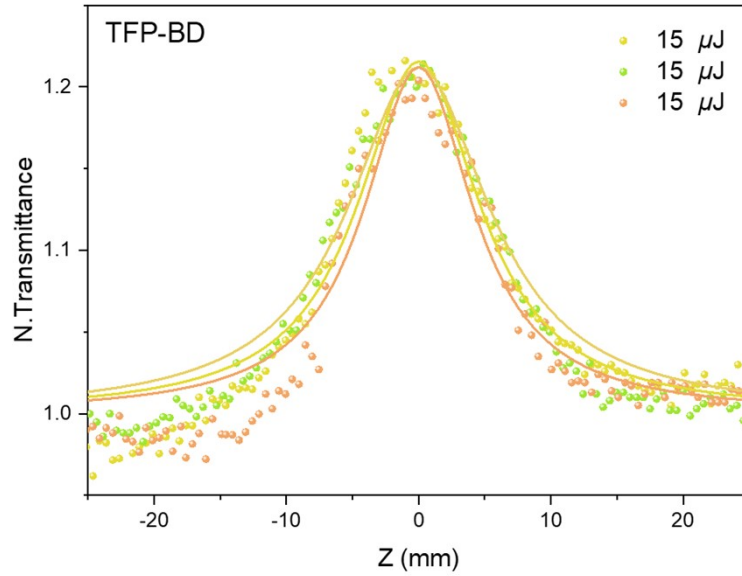

**Figure S15.** Open-aperture Z-scan curves with pulse energy of  $15 \mu\text{J}$  at the same position repeated 3 times of TFP-BD.

The third-order NLO stability of the prepared COFs film was further demonstrated by three experiments at the same position of TFP-BD film at  $15 \mu\text{J}$  (Fig. S15).

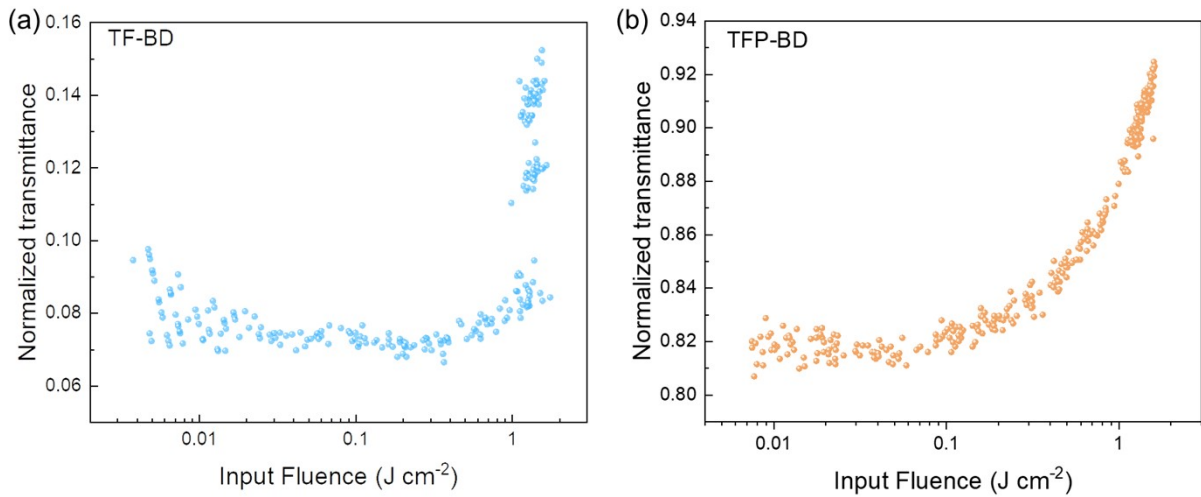

**Figure S16.** The plots of normalized transmittance versus input fluence (a) TF-BD and (b) TFP-BD films.

**Table S2.** Calculated HOMO energy level, LUMO energy level, and HOMO-LUMO gaps values of COF films in B3LYP/6-31G(d).

| Sample | $E_{HOMO}$ (eV) | $E_{LUMO}$ (eV) | HOMO-LUMO gaps (eV) |
|--------|-----------------|-----------------|---------------------|
| TF-BD  | -4.82           | -1.63           | 3.19                |
| TFP-BD | -5.00           | -2.63           | 2.37                |

**Table S3.** Third order nonlinear optical refraction parameters of the COF films obtained with different pulse energies by open-aperture Z-scan.

| Sample | Pulse energy ( $\mu$ J) | Transmittance | $L$ (nm) | $L_{eff}$ (nm) | Fit depth | $\beta$ (cm GW <sup>-1</sup> ) |
|--------|-------------------------|---------------|----------|----------------|-----------|--------------------------------|
| TF-BD  | 5                       | 0.17          | 404      | 386            | 0.22      | $2.81 \times 10^4$             |
|        | 10                      | 0.18          |          |                | 0.45      | $-2.80 \times 10^4$            |
| TFP-BD | 5                       | 0.73          | 17       | 29             | 0.40      | $-2.01 \times 10^5$            |
|        | 10                      | 0.73          |          |                | 1.00      | $-3.01 \times 10^5$            |
|        | 15                      | 0.73          |          |                | 0.61      | $-2.04 \times 10^5$            |
|        | 15                      | 0.73          |          |                | 0.60      | $-2.01 \times 10^5$            |
|        | 15                      | 0.73          |          |                | 0.60      | $-2.01 \times 10^5$            |

$\beta$ : nonlinear absorption coefficient, negative (-) values represent saturation absorption.



**Table S4.** Comparison of nonlinear absorption coefficients ( $\beta$ , negative (-) values represent saturation absorption) of third-order nonlinear optical materials reported recently.

|   | Name                                | Measurement condition                                 | $\beta$ (cm GW <sup>-1</sup> )                                                                                                 | Ref.             |
|---|-------------------------------------|-------------------------------------------------------|--------------------------------------------------------------------------------------------------------------------------------|------------------|
| 1 | TFP-BD                              | Z-scan,<br>532 nm,<br>10 $\mu$ J                      | $-3.01 \times 10^5$ cm GW <sup>-1</sup>                                                                                        | <i>This work</i> |
|   | TF-BD                               | Z-scan,<br>532 nm,<br>10 $\mu$ J                      | $-2.80 \times 10^4$ cm GW <sup>-1</sup>                                                                                        | <i>This work</i> |
| 2 | NOC6F-<br>2/PMMA                    | Z-scan                                                | $7.2 \times 10^{-10}$ m W <sup>-1</sup>                                                                                        | 17               |
| 3 | MoS <sub>2</sub> /graphene          | Z-scan, 800 nm, $I_0 \sim$<br>123 GW cm <sup>-2</sup> | $-1217.8$ cm GW <sup>-1</sup>                                                                                                  | 18               |
| 5 | Cs <sub>2</sub> AgBiBr <sub>6</sub> | Z-scan,<br>515 nm and 800 nm                          | $(-2.0 \pm 0.6) \times 10^4$ cm<br>GW <sup>-1</sup> (515 nm);<br>$(-7.1 \pm 0.05) \times 10^3$ cm<br>GW <sup>-1</sup> (800 nm) | 19               |
| 6 | De-4.8                              | Z-scan,<br>800 nm                                     | $-1578 \pm 49$ cm GW <sup>-1</sup>                                                                                             | 20               |
| 7 | Cu–Al–O thin<br>films               | Z-scan,<br>1550 nm                                    | $-6.29 \times 10^{-5}$ cm W <sup>-1</sup>                                                                                      | 21               |
| 8 | L3                                  | Z-scan,<br>400 nm                                     | $-80.63$ cm GW <sup>-1</sup>                                                                                                   | 22               |
| 9 | GaS                                 | Z-scan,<br>800 nm; 1066 nm                            | $-9.3 \times 10^3$ cm GW <sup>-1</sup> (800<br>nm);<br>$-91$ cm GW <sup>-1</sup> (1066 nm)                                     | 23               |

|    |                                                         |                            |                                                      |    |
|----|---------------------------------------------------------|----------------------------|------------------------------------------------------|----|
| 10 | BTFA<br>nanofilm COF                                    | Z-scan,<br>800 nm;         | $-10.1 \times 10^3 \text{ cm GW}^{-1}$               | 24 |
| 11 | MoS <sub>2</sub> film                                   | Z-scan                     | $-11.4 \text{ cm GW}^{-1}$                           | 25 |
| 12 | WS <sub>2</sub> film                                    | Z-scan                     | $-5.25 \times 10^2 \text{ cm GW}^{-1}$               |    |
| 13 | Bi <sub>2</sub> O <sub>2</sub> Se                       | Z-scan                     | $-2.9 \times 10^3 \text{ cm GW}^{-1}$                | 26 |
| 14 | PtSe <sub>2</sub>                                       | Z-scan                     | $-9.94 \times 10^3 \text{ cm GW}^{-1}$               | 27 |
| 15 | BP                                                      | Z-scan                     | $-0.01 \text{ cm GW}^{-1}$                           | 28 |
| 16 | BPQDs/PMMA                                              | Z-scan                     | $-(0.41 \pm 0.06) \times 10^{-3} \text{ cm GW}^{-1}$ | 29 |
| 17 | Mxene                                                   | Z-scan                     | $-0.297 \text{ cm GW}^{-1}$                          | 30 |
| 18 | GDY-PVP<br>nanocomposite                                | Z-scan                     | $-10.96 \text{ cm GW}^{-1}$                          | 31 |
| 19 | GO                                                      | Z-scan                     | $-40 \text{ cm GW}^{-1}$                             | 32 |
| 20 | Ti <sub>3</sub> C <sub>2</sub> T <sub>x</sub> (=O rich) | 515 nm                     | $-1020 \pm 136.2 \text{ cm GW}^{-1}$                 | 33 |
| 21 | HgL2-1.0–150                                            | Z-scan, 532 nm, 11 $\mu$ J | $-134 \text{ cm GW}^{-1}$                            | 34 |

**Table S5.** Unit cell parameters and fractional atomic coordinates for TF-BD were calculated based on the AB stacking.

| Space group          |         |          |         | <i>P1</i>                                                                                      |         |         |         |
|----------------------|---------|----------|---------|------------------------------------------------------------------------------------------------|---------|---------|---------|
| Calculated unit cell |         |          |         | a = 23.7405 Å, b = 23.7405 Å, c = 7.0428 Å<br>$\alpha = \beta = 90^\circ, \gamma = 120^\circ.$ |         |         |         |
| Atoms                | X       | Y        | Z       | Atoms                                                                                          | X       | Y       | Z       |
| C1                   | 1.05411 | 0.00771  | 0.33780 | C50                                                                                            | 0.73759 | 0.3648  | 0.79700 |
| C2                   | 1.08596 | -0.02494 | 0.27116 | C51                                                                                            | 0.76944 | 0.33215 | 0.73036 |
| C3                   | 1.15370 | 0.00482  | 0.27247 | C52                                                                                            | 0.83718 | 0.36191 | 0.73167 |
| C4                   | 1.19190 | 0.06886  | 0.33746 | C53                                                                                            | 0.87538 | 0.42595 | 0.79666 |
| C5                   | 1.16077 | 0.10213  | 0.40264 | C54                                                                                            | 0.84425 | 0.45922 | 0.86184 |
| C6                   | 1.09298 | 0.07174  | 0.40428 | C55                                                                                            | 0.77646 | 0.42883 | 0.86348 |
| C7                   | 1.26375 | 0.10074  | 0.33717 | C56                                                                                            | 0.94723 | 0.45783 | 0.79637 |
| C8                   | 1.29451 | 0.06409  | 0.30963 | C57                                                                                            | 0.97799 | 0.42118 | 0.76882 |
| C9                   | 0.36482 | 0.0952   | 0.30980 | C58                                                                                            | 0.04830 | 0.45229 | 0.76899 |
| C10                  | 0.40282 | 0.16224  | 0.33606 | C59                                                                                            | 0.08630 | 0.51933 | 0.79526 |
| C11                  | 0.37239 | 0.19923  | 0.36329 | C60                                                                                            | 0.05587 | 0.55632 | 0.82249 |
| C12                  | 1.30208 | 0.16803  | 0.36437 | C61                                                                                            | 0.98556 | 0.52512 | 0.82356 |
| N13                  | 0.47217 | 0.19149  | 0.33511 | N62                                                                                            | 0.15565 | 0.54858 | 0.79431 |
| C14                  | 0.58201 | 0.28169  | 0.34599 | C63                                                                                            | 0.26549 | 0.63878 | 0.80519 |
| C15                  | 0.61014 | 0.24198  | 0.34606 | C64                                                                                            | 0.29362 | 0.59907 | 0.80526 |
| C16                  | 0.51125 | 0.25375  | 0.34608 | C65                                                                                            | 0.19473 | 0.61084 | 0.80527 |
| C17                  | 0.95172 | 0.01570  | 0.33780 | C66                                                                                            | 0.63520 | 0.37279 | 0.79700 |
| C18                  | 0.98437 | 0.08020  | 0.27116 | C67                                                                                            | 0.66785 | 0.43729 | 0.73036 |
| C19                  | 0.95461 | 0.11818  | 0.27247 | C68                                                                                            | 0.63809 | 0.47527 | 0.73167 |
| C20                  | 0.89057 | 0.09234  | 0.33746 | C69                                                                                            | 0.57405 | 0.44943 | 0.79666 |
| C21                  | 0.85730 | 0.02794  | 0.40264 | C70                                                                                            | 0.54078 | 0.38503 | 0.86184 |
| C22                  | 0.88769 | -0.00946 | 0.40428 | C71                                                                                            | 0.57117 | 0.34763 | 0.86348 |
| C23                  | 0.85869 | 0.13231  | 0.33717 | C72                                                                                            | 0.54217 | 0.48940 | 0.79637 |
| C24                  | 0.89534 | 0.19972  | 0.30963 | C73                                                                                            | 0.57882 | 0.55681 | 0.76882 |

---

|     |         |          |         |     |         |         |         |
|-----|---------|----------|---------|-----|---------|---------|---------|
| C25 | 0.86423 | 0.23892  | 0.3098  | C74 | 0.54771 | 0.59601 | 0.76899 |
| C26 | 0.79719 | 0.20988  | 0.33606 | C75 | 0.48067 | 0.56697 | 0.79526 |
| C27 | 0.76020 | 0.14246  | 0.36329 | C76 | 0.44368 | 0.49955 | 0.82249 |
| C28 | 0.79140 | 0.10335  | 0.36437 | C77 | 0.47488 | 0.46044 | 0.82356 |
| N29 | 0.76794 | 0.24998  | 0.33511 | N78 | 0.45142 | 0.60707 | 0.79431 |
| C30 | 0.67774 | 0.26962  | 0.34599 | C79 | 0.36122 | 0.62671 | 0.80519 |
| C31 | 0.71745 | 0.33746  | 0.34606 | C80 | 0.40093 | 0.69455 | 0.80526 |
| C32 | 0.70568 | 0.22680  | 0.34608 | C81 | 0.38916 | 0.58389 | 0.80527 |
| C33 | 0.94373 | -0.09468 | 0.33780 | C82 | 0.62721 | 0.26241 | 0.79700 |
| C34 | 0.87923 | -0.12653 | 0.27116 | C83 | 0.56271 | 0.23056 | 0.73036 |
| C35 | 0.84125 | -0.19427 | 0.27247 | C84 | 0.52473 | 0.16282 | 0.73167 |
| C36 | 0.86709 | -0.23247 | 0.33746 | C85 | 0.55057 | 0.12462 | 0.79666 |
| C37 | 0.93149 | -0.20134 | 0.40264 | C86 | 0.61497 | 0.15575 | 0.86184 |
| C38 | 0.96889 | -0.13355 | 0.40428 | C87 | 0.65237 | 0.22354 | 0.86348 |
| C39 | 0.82712 | -0.30432 | 0.33717 | C88 | 0.51060 | 0.05277 | 0.79637 |
| C40 | 0.75971 | -0.33508 | 0.30963 | C89 | 0.44319 | 0.02201 | 0.76882 |
| C41 | 0.72051 | 0.59461  | 0.3098  | C90 | 0.40399 | 0.95170 | 0.76899 |
| C42 | 0.74955 | 0.55661  | 0.33606 | C91 | 0.43303 | 0.91370 | 0.79526 |
| C43 | 0.81697 | 0.58704  | 0.36329 | C92 | 0.50045 | 0.94413 | 0.82249 |
| C44 | 0.85608 | -0.34265 | 0.36437 | C93 | 0.53956 | 0.01444 | 0.82356 |
| N45 | 0.70945 | 0.48726  | 0.33511 | N94 | 0.39293 | 0.84435 | 0.79431 |
| C46 | 0.68981 | 0.37742  | 0.34599 | C95 | 0.37329 | 0.73451 | 0.80519 |
| C47 | 0.62197 | 0.34929  | 0.34606 | C96 | 0.30545 | 0.70638 | 0.80526 |
| C48 | 0.73263 | 0.44818  | 0.34608 | C97 | 0.41611 | 0.80527 | 0.80527 |
| N49 | 0.98319 | -0.02376 | 0.33788 | N98 | 0.66667 | 0.33333 | 0.79707 |

---

**Table S6.** Unit cell parameters and fractional atomic coordinates for TFP-BD were calculated based on the AB stacking.

| Space group          |         |         |         | <i>P1</i>                                                                                                                      |         |         |          |
|----------------------|---------|---------|---------|--------------------------------------------------------------------------------------------------------------------------------|---------|---------|----------|
| Calculated unit cell |         |         |         | $a = 23.8228 \text{ \AA}, b = 23.8228 \text{ \AA}, c = 7.0200 \text{ \AA}$<br>$\alpha = \beta = 90^\circ, \gamma = 120^\circ.$ |         |         |          |
| Atoms                | X       | Y       | Z       | Atoms                                                                                                                          | X       | Y       | Z        |
| C1                   | 0.74307 | 0.48185 | 0.31371 | C53                                                                                                                            | 0.07896 | 0.15159 | -0.27071 |
| C2                   | 0.81164 | 0.52501 | 0.31371 | C54                                                                                                                            | 0.14750 | 0.19465 | -0.27071 |
| C3                   | 0.83992 | 0.59396 | 0.31371 | C55                                                                                                                            | 0.17576 | 0.26354 | -0.27071 |
| C4                   | 0.90742 | 0.63310 | 0.31371 | C56                                                                                                                            | 0.24323 | 0.30265 | -0.27071 |
| C5                   | 0.93605 | 0.70064 | 0.31371 | C57                                                                                                                            | 0.27183 | 0.37018 | -0.27071 |
| C6                   | 0.89750 | 0.73000 | 0.31371 | C58                                                                                                                            | 0.23329 | 0.39958 | -0.27071 |
| C7                   | 0.82975 | 0.69036 | 0.31371 | C59                                                                                                                            | 0.16554 | 0.35991 | -0.27071 |
| C8                   | 0.80115 | 0.62293 | 0.31371 | C60                                                                                                                            | 0.13697 | 0.29248 | -0.27071 |
| C9                   | 0.71534 | 0.41694 | 0.31371 | C61                                                                                                                            | 0.0513  | 0.08674 | -0.27071 |
| C10                  | 0.75368 | 0.38318 | 0.31371 | C62                                                                                                                            | 0.0897  | 0.05309 | -0.27071 |
| C11                  | 0.92758 | 0.80151 | 0.31371 | C63                                                                                                                            | 0.26342 | 0.47116 | -0.27071 |
| C12                  | 0.99497 | 0.84148 | 0.31371 | C64                                                                                                                            | 0.33083 | 0.51116 | -0.27071 |
| N13                  | 0.02269 | 0.90881 | 0.31371 | N65                                                                                                                            | 0.35863 | 0.57855 | -0.27071 |
| C14                  | 0.98537 | 0.93974 | 0.31371 | C66                                                                                                                            | 0.32136 | 0.60956 | -0.27071 |
| C15                  | 0.91767 | 0.89797 | 0.31371 | C67                                                                                                                            | 0.25364 | 0.56778 | -0.27071 |
| C16                  | 0.88909 | 0.8306  | 0.31371 | C68                                                                                                                            | 0.22500 | 0.50034 | -0.27071 |
| O17                  | 0.61230 | 0.40605 | 0.31371 | O69                                                                                                                            | 0.94829 | 0.07581 | -0.27071 |
| C18                  | 0.54492 | 0.26886 | 0.31371 | C70                                                                                                                            | 0.88112 | 0.93870 | -0.27071 |
| C19                  | 0.50176 | 0.29427 | 0.31371 | C71                                                                                                                            | 0.83806 | 0.96418 | -0.27071 |
| C20                  | 0.43281 | 0.25360 | 0.31371 | C72                                                                                                                            | 0.76917 | 0.92355 | -0.27071 |
| C21                  | 0.39367 | 0.28196 | 0.31371 | C73                                                                                                                            | 0.73006 | 0.95191 | -0.27071 |
| C22                  | 0.32613 | 0.24305 | 0.31371 | C74                                                                                                                            | 0.66253 | 0.91298 | -0.27071 |
| C23                  | 0.29677 | 0.17514 | 0.31371 | C75                                                                                                                            | 0.63313 | 0.84504 | -0.27071 |
| C24                  | 0.33641 | 0.14703 | 0.31371 | C76                                                                                                                            | 0.6728  | 0.81696 | -0.27071 |
| C25                  | 0.40384 | 0.18586 | 0.31371 | C77                                                                                                                            | 0.74023 | 0.85582 | -0.27071 |

---

|     |         |         |         |      |         |         |          |
|-----|---------|---------|---------|------|---------|---------|----------|
| C26 | 0.60983 | 0.30604 | 0.31371 | C78  | 0.94597 | 0.97589 | -0.27071 |
| C27 | 0.64359 | 0.37814 | 0.31371 | C79  | 0.97962 | 0.04794 | -0.27071 |
| C28 | 0.22526 | 0.13371 | 0.31371 | C80  | 0.56155 | 0.80359 | -0.27071 |
| C29 | 0.18529 | 0.16113 | 0.31371 | C81  | 0.52155 | 0.831   | -0.27071 |
| N30 | 0.11796 | 0.12152 | 0.31371 | N82  | 0.45416 | 0.79141 | -0.27071 |
| C31 | 0.08703 | 0.05327 | 0.31371 | C83  | 0.42315 | 0.72313 | -0.27071 |
| C32 | 0.1288  | 0.02734 | 0.31371 | C84  | 0.46493 | 0.69719 | -0.27071 |
| C33 | 0.19617 | 0.06613 | 0.31371 | C85  | 0.53237 | 0.73599 | -0.27071 |
| O34 | 0.62072 | 0.21389 | 0.31371 | O86  | 0.9569  | 0.88381 | -0.27071 |
| C35 | 0.75791 | 0.2837  | 0.31371 | C87  | 0.09401 | 0.95375 | -0.27071 |
| C36 | 0.7325  | 0.21513 | 0.31371 | C88  | 0.06853 | 0.88521 | -0.27071 |
| C37 | 0.77317 | 0.18685 | 0.31371 | C89  | 0.10916 | 0.85695 | -0.27071 |
| C38 | 0.74481 | 0.11935 | 0.31371 | C90  | 0.0808  | 0.78948 | -0.27071 |
| C39 | 0.78372 | 0.09072 | 0.31371 | C91  | 0.11973 | 0.76088 | -0.27071 |
| C40 | 0.85163 | 0.12927 | 0.31371 | C92  | 0.18767 | 0.79942 | -0.27071 |
| C41 | 0.87974 | 0.19702 | 0.31371 | C93  | 0.21575 | 0.86717 | -0.27071 |
| C42 | 0.84091 | 0.22562 | 0.31371 | C94  | 0.17689 | 0.89574 | -0.27071 |
| C43 | 0.72073 | 0.31143 | 0.31371 | C95  | 0.05682 | 0.98141 | -0.27071 |
| C44 | 0.64863 | 0.27309 | 0.31371 | C96  | 0.98477 | 0.94301 | -0.27071 |
| C45 | 0.89306 | 0.09919 | 0.31371 | C97  | 0.22912 | 0.76929 | -0.27071 |
| C46 | 0.86564 | 0.0318  | 0.31371 | C98  | 0.20171 | 0.70188 | -0.27071 |
| N47 | 0.90525 | 1.00408 | 0.31371 | N99  | 0.24130 | 0.67408 | -0.27071 |
| C48 | 0.97350 | 0.04140 | 0.31371 | C100 | 0.30958 | 0.71135 | -0.27071 |
| C49 | 0.99943 | 0.1091  | 0.31371 | C101 | 0.33552 | 0.77907 | -0.27071 |
| C50 | 0.96064 | 0.13768 | 0.31371 | C102 | 0.29672 | 0.80771 | -0.27071 |
| O51 | 0.81288 | 0.41447 | 0.31371 | O103 | 0.14890 | 0.08442 | -0.27071 |
| N52 | 0.01530 | 0.01147 | 0.31371 | N104 | 0.35137 | 0.68135 | -0.27071 |

---

## References

1. M. Li, C. Gong, J. Du, D. Ding, D. Du, D. Wang, J. Jiang, T. Li, C. Zheng, Y.-F. Yang, Y. She and J. Jia, Donor–Acceptor Covalent Organic Frameworks Films with Ultralow Band Gaps to Enhanced Third-Order Nonlinear Optical Properties, *ACS Materials Lett.*, 2023, **5**, 694-703.
2. M. J. Frisch, G. W. Trucks, H. B. Schlegel, G. E. Scuseria, M. A. Robb, J. R. Cheeseman, G. Scalmani, V. Barone, G. A. Petersson, H. Nakatsuji, X. Li, M. Caricato, A. V. Marenich, J. Bloino, B. G. Janesko, R. Gomperts, B. Mennucci, H. P. Hratchian, J. V. Ortiz, A. F. Izmaylov, J. L. Sonnenberg, Williams, F. Ding, F. Lipparini, F. Egidi, J. Goings, B. Peng, A. Petrone, T. Henderson, D. Ranasinghe, V. G. Zakrzewski, J. Gao, N. Rega, G. Zheng, W. Liang, M. Hada, M. Ehara, K. Toyota, R. Fukuda, J. Hasegawa, M. Ishida, T. Nakajima, Y. Honda, O. Kitao, H. Nakai, T. Vreven, K. Throssell, J. A. Montgomery Jr., J. E. Peralta, F. Ogliaro, M. J. Bearpark, J. J. Heyd, E. N. Brothers, K. N. Kudin, V. N. Staroverov, T. A. Keith, R. Kobayashi, J. Normand, K. Raghavachari, A. P. Rendell, J. C. Burant, S. S. Iyengar, J. Tomasi, M. Cossi, J. M. Millam, M. Klene, C. Adamo, R. Cammi, J. W. Ochterski, R. L. Martin, K. Morokuma, O. Farkas, J. B. Foresman and D. J. Fox, Gaussian 16 Rev. A.03. *Journal*, 2016.
3. A. D. Becke, A new mixing of Hartree–Fock and local density-functional theories, *J. Chem. Phys.*, 1993, **98**, 1372-1377.
4. A. D. Becke, Density-functional thermochemistry. III. The role of exact exchange, *J. Chem. Phys.*, 1993, **98**, 5648-5652.
5. P. J. Stephens, F. J. Devlin, C. F. Chabalowski and M. J. Frisch, Ab Initio Calculation of Vibrational Absorption and Circular Dichroism Spectra Using Density Functional Force Fields, *J. Phys. Chem.*, 1994, **98**, 11623-11627.
6. R. Ditchfield, W. J. Hehre and J. A. Pople, Self-Consistent Molecular-Orbital Methods. IX. An Extended Gaussian-Type Basis for Molecular-Orbital Studies of Organic Molecules, *J. Chem. Phys.*, 1971, **54**, 724-728.
7. W. J. Hehre, R. Ditchfield and J. A. Pople, Self—Consistent Molecular Orbital Methods. XII. Further Extensions of Gaussian—Type Basis Sets for Use in Molecular Orbital Studies of Organic Molecules, *J. Chem. Phys.*, 1972, **56**, 2257-2261.
8. S. Manzetti and T. Lu, Alternant conjugated oligomers with tunable and narrow HOMO-LUMO gaps as sustainable nanowires, *RSC Adv.*,

- 2013, **3**, 25881-25890.
9. Z. Qiao, H. Han, X. Li, X. Wang, T. Lan, R. Wang and W. Ji, Dual Functional  $sp^2$  Carbon-Conjugated Nanoporous Covalent Organic Framework as a Janus Fluorescence Sensor for the Detection of Hazardous Substances, *ACS Appl. Nano Mater.*, 2022, **5**, 11465-11473.
  10. X. Chen, H. Zhang, C. Ci, W. Sun and Y. Wang, Few-Layered Boronic Ester Based Covalent Organic Frameworks/Carbon Nanotube Composites for High-Performance K-Organic Batteries, *ACS Nano*, 2019, **13**, 3600-3607.
  11. C. Zhang, S. Zhang, Y. Yan, F. Xia, A. Huang and Y. Xian, Highly Fluorescent Polyimide Covalent Organic Nanosheets as Sensing Probes for the Detection of 2,4,6-Trinitrophenol, *ACS Appl. Mater. Interfaces*, 2017, **9**, 13415-13421.
  12. R. Xia, X. Zheng, C. Li, X. Yuan, J. Wang, Z. Xie and X. Jing, Nanoscale Covalent Organic Frameworks with Donor–Acceptor Structure for Enhanced Photothermal Ablation of Tumors, *ACS Nano*, 2021, **15**, 7638-7648.
  13. Materials Studio; Accelrys: San Diego.
  14. <http://www.ba.ic.cnr.it/softwareic/expo/>.
  15. <http://www.jp-minerals.org/vesta/en/>.
  16. L. Xu, J. Sun, T. Tang, H. Zhang, M. Sun, J. Zhang, J. Li, B. Huang, Z. Wang, Z. Xie and W. Y. Wong, Metallated Graphynes as a New Class of Photofunctional 2D Organometallic Nanosheets, *Angew. Chem. Int. Ed.*, 2021, **60**, 11326-11334.
  17. T. Dong, J. Li, C. Wang, L. Yu, Y. Song, C. Wang, L. Jiang and C. Bai, Unexpected Third-Order Nonlinear Optical Responses in Two Isomeric Non-Fused Ring A-D-A Electron-Acceptor Molecules, *Adv. Optical Mater.*, 2023, **n/a**, 2300482.
  18. M. He, C. Quan, C. He, Y. Huang, L. Zhu, Z. Yao, S. Zhang, J. Bai and X. Xu, Enhanced Nonlinear Saturable Absorption of  $MoS_2$ /Graphene Nanocomposite Films, *J. Phys. Chem. C*, 2017, **121**, 27147-27153.
  19. B. Li, H. Li, Y. Sun, M. G. Humphrey, C. Zhang and Z. Huang, Defect-Dependent Nonlinear Absorption in the Lead-Free Double-Perovskite  $Cs_2AgBiBr_6$ , *ACS Appl. Mater. Interfaces*, 2023, **15**, 10858-10867.
  20. Y. Sun, H. Li, X. Gao, M. G. Humphrey, C. Zhang and Z. Huang, Promoting the nonlinear optical absorption of conjugated polymers by in-gap states modulation via chemical dedoping, *Mat. Today Phys.*,



- 2023, **32**, 101024.
21. J. Xu, Q. Liu, X. Li, R. Hong, C. Tao, Q. Wang, H. Lin, Z. Han and D. Zhang, Tunability of nonlinear optical properties of amorphous Cu–Al–O films induced by thermal oxidation, *Opt. Mater.*, 2023, **136**, 113466.
  22. X. Xiao, M. Liu, J. Zhou, H. Zhu, C. Wang, Z. Chen, Y. Wang, S. Xiao and J. He, The ultrafast tunable saturable absorption of three azo-Schiff base ligands and related metal complexes, *Opt. Mater.*, 2022, **132**, 112773.
  23. S. Ahmed, P. K. Cheng, J. Qiao, W. Gao, A. M. Saleque, M. N. Al Subri Ivan, T. Wang, T. I. Alam, S. U. Hani, Z. L. Guo, S. F. Yu and Y. H. Tsang, Nonlinear Optical Activities in Two-Dimensional Gallium Sulfide: A Comprehensive Study, *ACS Nano*, 2022, **16**, 12390-12402.
  24. Y. Luo, M. Li, J. Tang, J. Zang, Y. Wang, T. Liu and Y. Fang, Interfacially confined preparation of fumaronitrile-based nanofilms exhibiting broadband saturable absorption properties, *J. Colloid Interface Sci.*, 2022, **627**, 569-577.
  25. S. Zhang, N. Dong, N. McEvoy, M. O'Brien, S. Winters, N. C. Berner, C. Yim, Y. Li, X. Zhang, Z. Chen, L. Zhang, G. S. Duesberg and J. Wang, Direct Observation of Degenerate Two-Photon Absorption and Its Saturation in WS<sub>2</sub> and MoS<sub>2</sub> Monolayer and Few-Layer Films, *ACS Nano*, 2015, **9**, 7142-7150.
  26. X. Tian, H. Luo, R. Wei, C. Zhu, Q. Guo, D. Yang, F. Wang, J. Li and J. Qiu, An Ultrabroadband Mid-Infrared Pulsed Optical Switch Employing Solution-Processed Bismuth Oxyselenide, *Adv. Mater.*, 2018, **30**, 1801021.
  27. G. Wang, Z. Wang, N. McEvoy, P. Fan and W. J. Blau, Layered PtSe<sub>2</sub> for Sensing, Photonic, and (Opto-)Electronic Applications, *Adv. Mater.*, 2021, **33**, 2004070.
  28. K. Wang, B. M. Szydłowska, G. Wang, X. Zhang, J. J. Wang, J. J. Magan, L. Zhang, J. N. Coleman, J. Wang and W. J. Blau, Ultrafast Nonlinear Excitation Dynamics of Black Phosphorus Nanosheets from Visible to Mid-Infrared, *ACS Nano*, 2016, **10**, 6923-6932.
  29. Y. Xu, W. Wang, Y. Ge, H. Guo, X. Zhang, S. Chen, Y. Deng, Z. Lu and H. Zhang, Stabilization of Black Phosphorous Quantum Dots in PMMA Nanofiber Film and Broadband Nonlinear Optics and Ultrafast Photonics Application, *Adv. Funct. Mater.*, 2017, **27**, 1702437.
  30. X. Jiang, S. Liu, W. Liang, S. Luo, Z. He, Y. Ge, H. Wang, R. Cao, F. Zhang, Q. Wen, J. Li, Q. Bao, D. Fan and H. Zhang, Broadband Nonlinear

- Photonics in Few-Layer MXene  $Ti_3C_2Tx$  (T = F, O, or OH), *Laser Photonics Rev.*, 2018, **12**, 1700229.
31. J. Guo, R. Shi, R. Wang, Y. Wang, F. Zhang, C. Wang, H. Chen, C. Ma, Z. Wang, Y. Ge, Y. Song, Z. Luo, D. Fan, X. Jiang, J. Xu and H. Zhang, Graphdiyne-Polymer Nanocomposite as a Broadband and Robust Saturable Absorber for Ultrafast Photonics, *Laser Photonics Rev.*, 2020, **14**, 1900367.
  32. S. Kumar, M. Anija, N. Kamaraju, K. S. Vasu, K. S. Subrahmanyam, A. K. Sood and C. N. R. Rao, Femtosecond carrier dynamics and saturable absorption in graphene suspensions, *Appl. Phys. Lett.*, 2009, **95**, 191911.
  33. H. Li, S. Chen, D. W. Boukhvalov, Z. Yu, M. G. Humphrey, Z. Huang and C. Zhang, Switching the Nonlinear Optical Absorption of Titanium Carbide MXene by Modulation of the Surface Terminations, *ACS Nano*, 2022, **16**, 394-404.
  34. L. Xu, J. Sun, T. Tang, H. Zhang, M. Sun, J. Zhang, J. Li, B. Huang, Z. Wang, Z. Xie and W.-Y. Wong, Metallated Graphynes as a New Class of Photofunctional 2D Organometallic Nanosheets, *Angew. Chem. Int. Ed.*, 2021, **60**, 11326-11334.
